# Supplementary material for: Elevated Levels of Growth/Differentiation Factor-15 in the Aqueous Humor and Serum of Glaucoma Patients
Source: MDPI journal article supplement (doi:10.3390/jcm11030744), 2022-01-29
Supplement: s1 [file s1]

**Figure S1:** Elevated IOP in POAG patients compared to non-glaucoma (cataract patients). The box and whisker plots represent median and the interquartile range in the distribution.

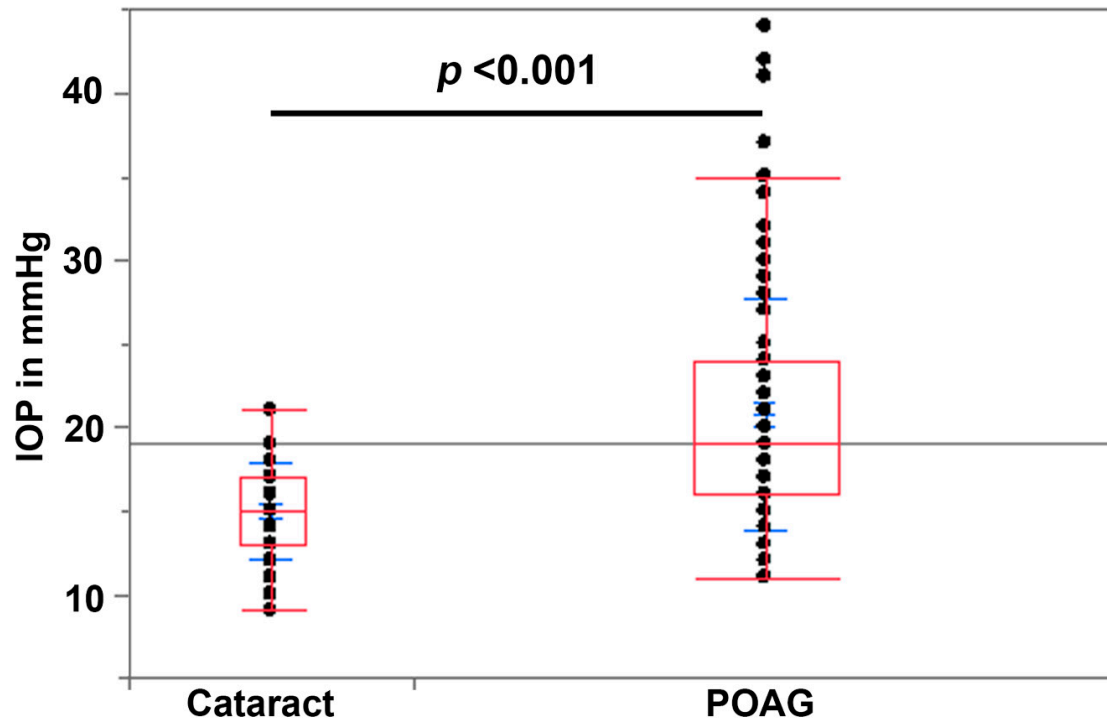

P-values were based on Wilcoxon rank sum test of difference between medians.

**Figure. S2.** Relationship between aqueous humor and serum GDF15 levels and IOP in POAG patients. AH GDF15 (A), serum GDF15 (B) and IOP of POAG patients did not reveal a significant relationship.

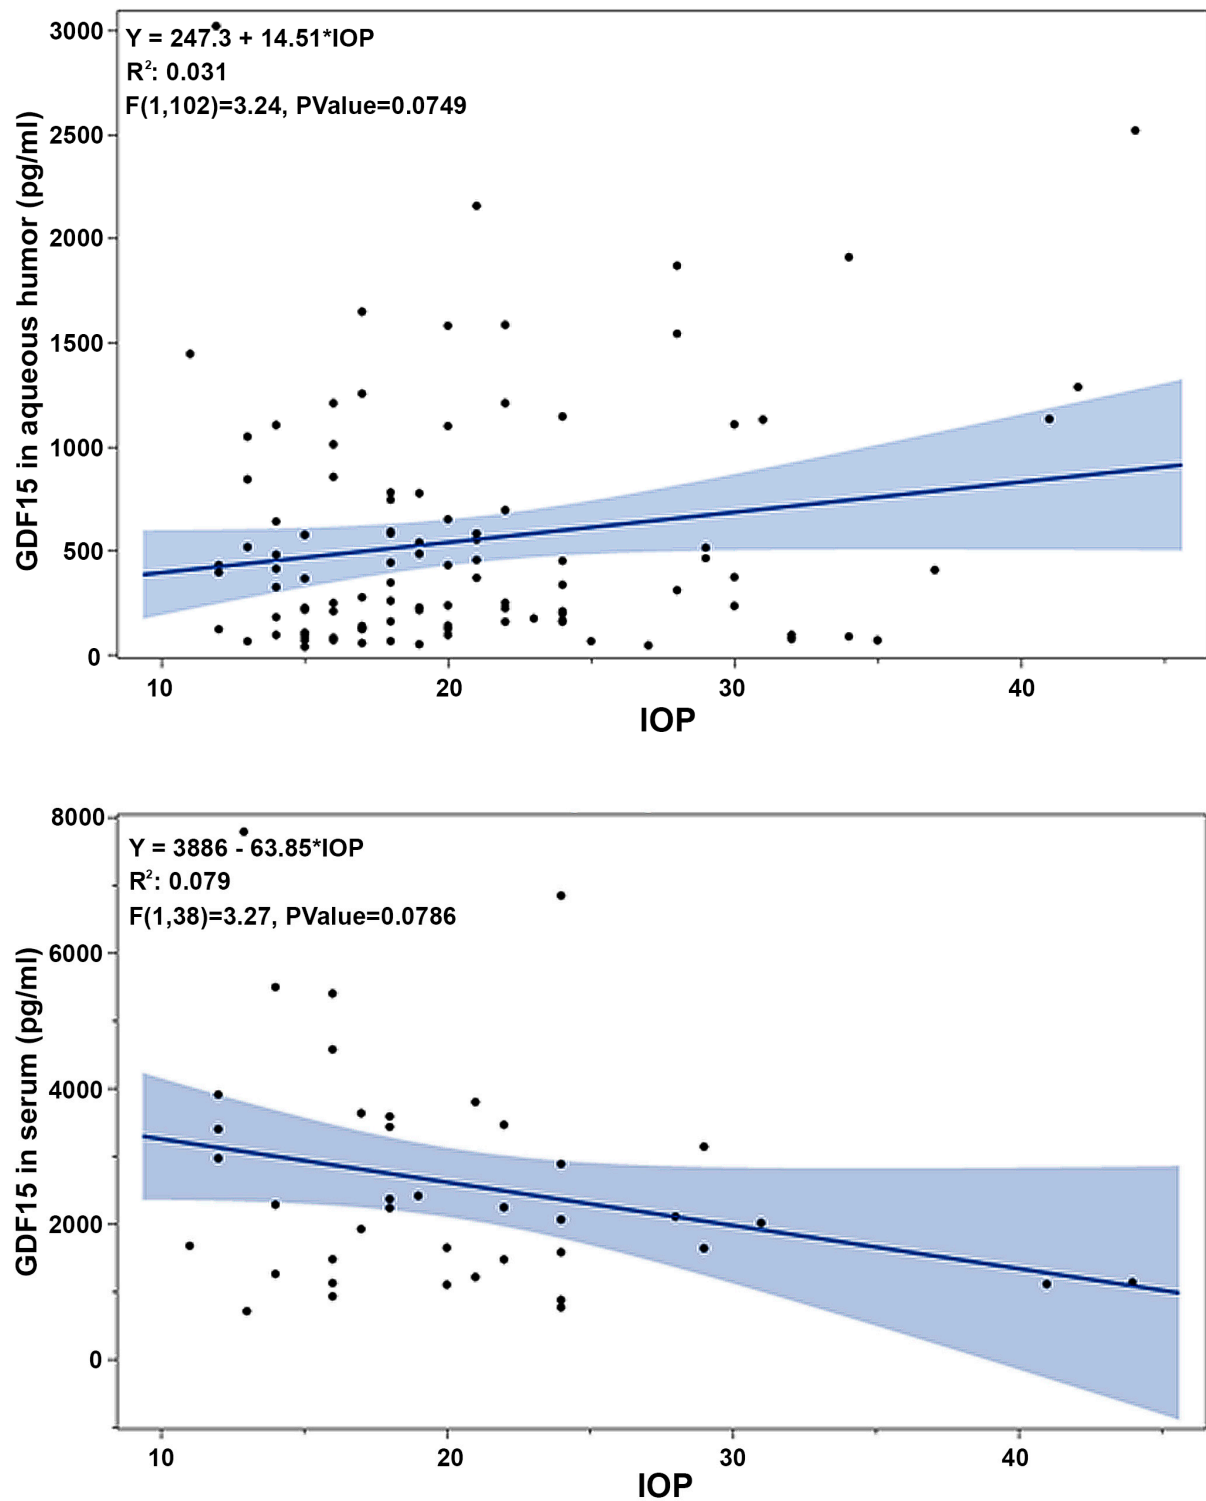

**Figure S3.** Relationship between aqueous humor and serum GDF15 levels and age in POAG patients. AH GDF15 (A), serum GDF15 (B) and age of POAG patients did not reveal a significant relationship.

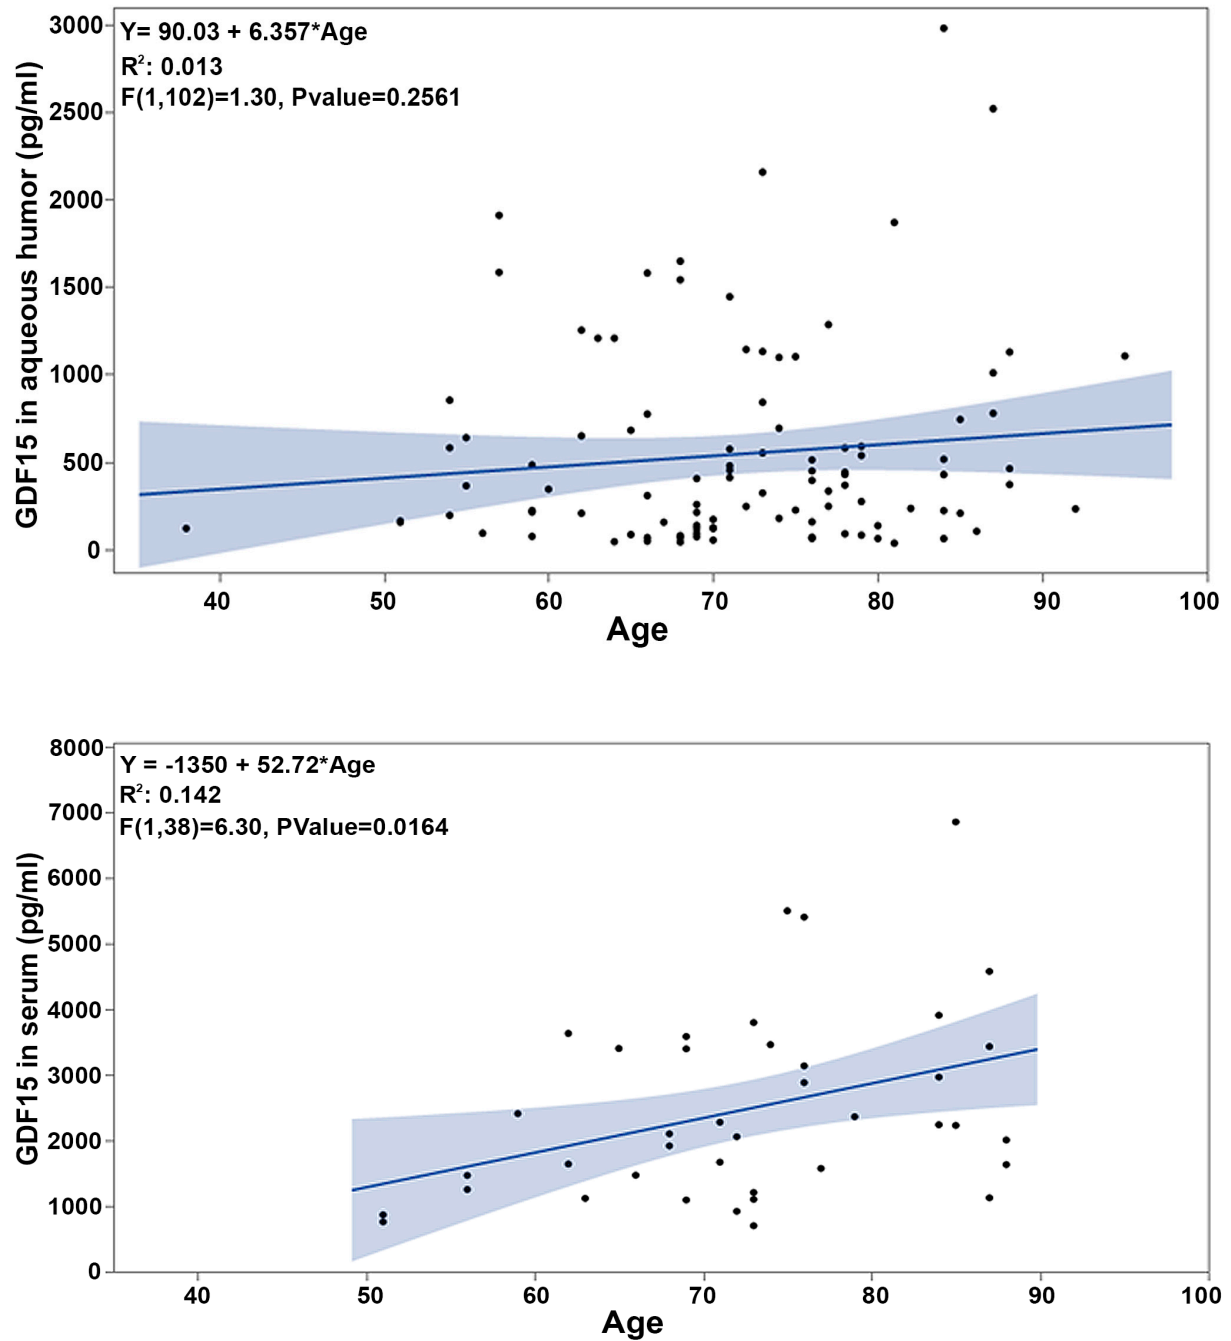

**Table S1: Demography details of the subgroup of POAG and cataract patient study**

|                  |                     | <b>Cataract<br/>n=32</b> | <b>POAG<br/>n=41</b> | <b>P-value*</b> |
|------------------|---------------------|--------------------------|----------------------|-----------------|
| Age              | n                   | 32                       | 40                   |                 |
|                  | Mean (SD)           | 70.8 (7.3)               | 72.6 (10.2)          | 0.416           |
|                  | Min, Median,<br>Max | 51, 72, 84               | 51, 73, 88           |                 |
| Gender           | n (%)               |                          |                      |                 |
| Female           |                     | 13 (40)                  | 22 (53)              |                 |
| Male             |                     | 19 (59)                  | 19 (46)              | 0.346           |
| Race             | n (%)               |                          |                      |                 |
| Asian            |                     | 1 (3)                    | 1 (2)                |                 |
| Caucasian        |                     | 29 (91)                  | 19 (46)              |                 |
| African American |                     | 2 (6)                    | 21 (51)              | <0.001          |

\*P-value for gender and race based on Fisher's exact test.

P-value for age based on two sample t-test.

Abbreviations: POAG, primary open-angle glaucoma; SD, Standard deviation.

**Table S2: GDF15 levels in the aqueous humor and serum of POAG and non-glaucoma (cataract) subjects.**

|               |                  | <b>Cataract</b>       | <b>POAG</b>           | <b><i>P</i>-value*</b> |
|---------------|------------------|-----------------------|-----------------------|------------------------|
| GDF15 (AH)    | n                | 32                    | 40                    |                        |
|               | Mean (SD)        | 103.63 (141.06)       | 791.20 (675.16)       |                        |
|               | Min, Median, Max | 1.5, 63.5, 776.0      | 68.0, 619.0, 2978.0   | <0.001                 |
| GDF15 (Serum) | n                | 32                    | 41                    |                        |
|               | Mean (SD)        | 1659.44 (1029.49)     | 2606.10 (1634.56)     |                        |
|               | Min, Median, Max | 189.0, 1481.5, 3950.0 | 701.0, 2228.0, 7771.0 | <0.011                 |

\**P*-value based on Wilcoxon rank sum test.

Abbreviations: GDF15, Growth/Differentiation Factor-15; POAG, primary open-angle glaucoma; AH, Aqueous humor; SD, Standard deviation.

**Table S3: GDF15 levels in the aqueous humor and serum of male and female POAG and cataract patients.**

| Variable      | Gender | Statistic        | Cataract              | POAG                   | p-value* |
|---------------|--------|------------------|-----------------------|------------------------|----------|
| GDF15 (AH)    | Female | n                | 19                    | 21                     | <0.001   |
|               |        | Mean (SD)        | 89.37 (68.73)         | 750.19 (844.09)        |          |
|               |        | Min, Median, Max | 3.0, 76.0, 250.0      | 68.0, 411.0, 2978.0    |          |
| GDF15 (AH)    | Male   | n                | 24                    | 19                     | <0.001   |
|               |        | Mean (SD)        | 104.88 (154.19)       | 836.53 (438.03)        |          |
|               |        | Min, Median, Max | 1.5, 64.0, 776.0      | 138.0, 743.0, 1647.0   |          |
| GDF15 (Serum) | Female | n                | 13                    | 22                     | 0.015    |
|               |        | Mean (SD)        | 1241.62 (930.85)      | 2598.73 (1735.00)      |          |
|               |        | Min, Median, Max | 189.0, 1302.0, 3682.0 | 701.0, 2141.5, 6849.0  |          |
| GDF15 (Serum) | Male   | n                | 19                    | 19                     | 0.148    |
|               |        | Mean (SD)        | 1945.32 (1017.50)     | 2614.63 (1557.31)      |          |
|               |        | Min, Median, Max | 287.0, 1850.0, 3950.0 | 1093.0, 2228.0, 7771.0 |          |

\*P-value based on Wilcoxon rank sum test of difference between medians.

Abbreviations: GDF15, Growth/Differentiation Factor-15; POAG, primary open-angle glaucoma; AH, Aqueous humor; SD, Standard deviation.

**Table S4: Demography details of the large cohort POAG and cataract patient study**

|        |                     | Cataract<br>N=117 | POAG<br>N=106 | P-value* |
|--------|---------------------|-------------------|---------------|----------|
| Age    | n                   | 117               | 105           |          |
|        | Mean (SD)           | 70.6 (8.7)        | 71.5 (10.3)   | 0.480    |
|        | Min, Median,<br>Max | 45, 72, 90        | 38, 71, 95    |          |
|        |                     |                   |               |          |
| Gender | n (%)               |                   |               |          |
|        | Female              | 64 (55)           | 54 (51)       |          |
|        | Male                | 53 (45)           | 52 (49)       | 0.593    |
|        |                     |                   |               |          |
| Race   | n (%)               |                   |               |          |
|        | Asian               | 4 (3)             | 1 (1)         |          |
|        | Caucasian           | 95 (82)           | 51 (49)       |          |
|        | African American    | 16 (14)           | 53 (50)       |          |
|        | Indian              | 1 (1)             | 0             | <0.001   |

\*p-value for gender and race based on Fisher's exact test.

p-value for age based on two sample t-test.

Abbreviations: POAG, primary open-angle glaucoma; SD, Standard deviation.

**Table S5: GDF15 levels in the aqueous humor of POAG and cataract patients.**

|            |                  | Cataract         | POAG                | <i>P</i> -Value* |
|------------|------------------|------------------|---------------------|------------------|
| GDF15 (AH) | n                | 117              | 105                 |                  |
|            | Mean (SD)        | 69.32 (87.63)    | 550.18 (577.13)     |                  |
|            | Min, Median, Max | 0.3, 49.0, 776.0 | 36.1, 364.0, 2978.0 | <0.001           |

\*\*p-Value based on Wilcoxon rank sum test of difference between medians.

Abbreviations: GDF15, Growth/Differentiation Factor-15; POAG, primary open-angle glaucoma; AH, Aqueous humor; SD, Standard deviation.

**Table S6: GDF15 levels in aqueous humor and serum samples from male and female cataract patients.**



| Variable      | Statistic        | Female                | Male                  | <i>P</i> -value* |
|---------------|------------------|-----------------------|-----------------------|------------------|
| GDF15 (AH)    | n                | 64                    | 53                    | 0.046            |
|               | Mean (SD)        | 60.41 (65.33)         | 80.07 (108.36)        |                  |
|               | Min, Median, Max | 0.3, 39.0, 357.1      | 1.5, 52.0, 776.0      |                  |
| GDF15 (Serum) | n                | 13                    | 19                    | 0.025            |
|               | Mean (SD)        | 1241.62 (930.85)      | 1945.32 (1017.50)     |                  |
|               | Min, Median, Max | 189.0, 1302.0, 3682.0 | 287.0, 1850.0, 3950.0 |                  |

\**p*-value based on Wilcoxon rank sum test of difference between medians.

Abbreviations: GDF15, Growth/Differentiation Factor-15; AH, Aqueous humor; SD, Standard deviation.
